# Supplementary material for: Spectroscopic Analysis of the Binding of Paraquat and Diquat Herbicides to Biosubstrates
Source: MDPI journal article supplement (doi:10.3390/ijerph18052412), 2021-03-02
Supplement: s1 [file s1]

## Supporting Information

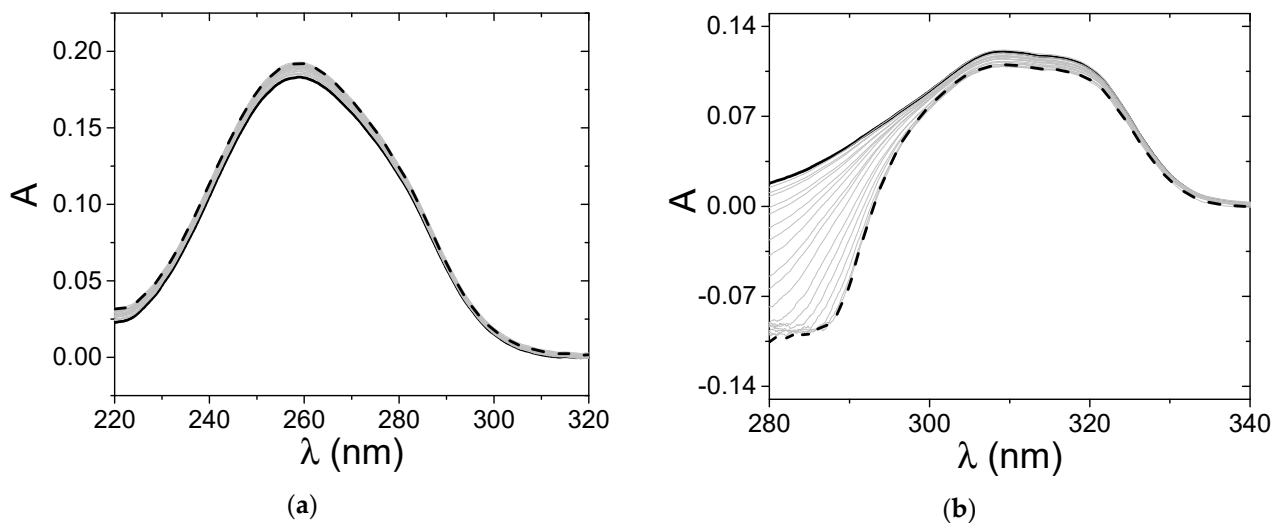

**Figure S1.** Spectrophotometric titrations of (a) PQ/DNA ( $C_{PQ} = 9.30 \times 10^{-6}$  M,  $C_{DNA}$  from 0 (solid) to  $6.49 \times 10^{-4}$  M (dash)) and (b) DQ/DNA ( $C_{DQ} = 6.87 \times 10^{-6}$  M,  $C_{DNA}$  from 0 (solid) to  $7.71 \times 10^{-6}$  M (dash)). NaCl 0.1 M, NaCac 2.5 mM, pH 7.0, 37.0°C.

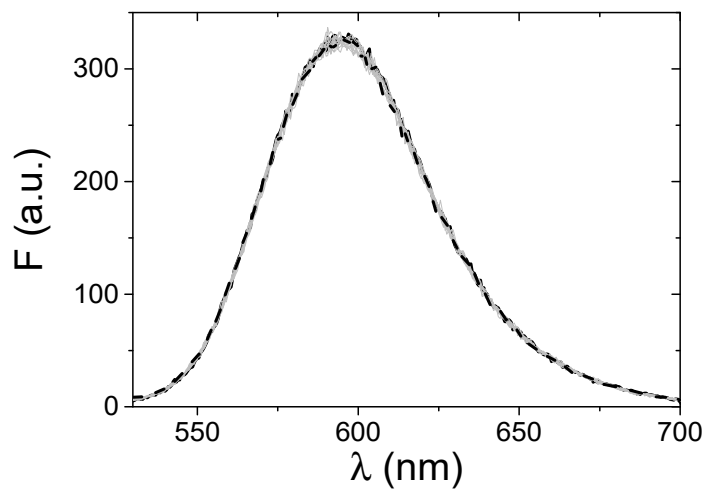

**Figure S2.** Fluorescence exchange titration of EtBr-saturated DNA with DQ at 25.0°C ( $C_{EtBr} = 9.96 \times 10^{-5}$  M,  $C_{DNA} = 2.43 \times 10^{-4}$  M,  $C_{DQ}$  from 0 (solid) to  $8.03 \times 10^{-4}$  M (dash), NaCl 0.1 M, NaCac 2.5 mM, pH 7.0, 25.0°C,  $\lambda_{exc} = 510$  nm,  $\lambda_{em} = 595$  nm).



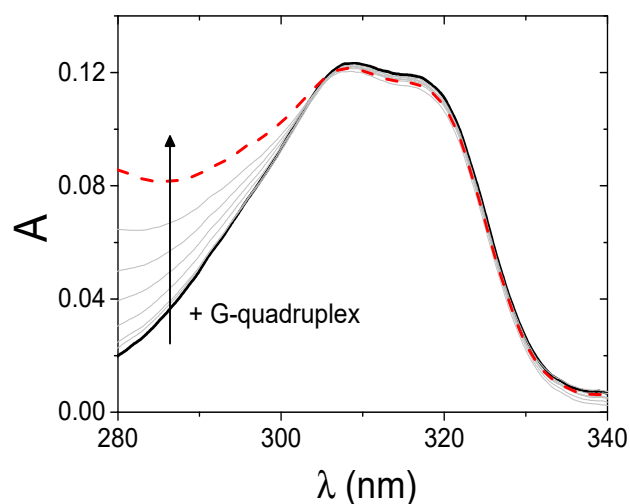

**Figure S3.** Spectrophotometric titration for the Tel23-DQ system;  $C_{\text{Tel}} = 7.77 \times 10^{-9}$  (—) –  $5.00 \times 10^{-7}$  M (---);  $C_{\text{DQ}} = 8.87 \times 10^{-6}$  M, KCl 0.1 M, KCac 2.5 mM, pH 7.0, 25.0 °C.

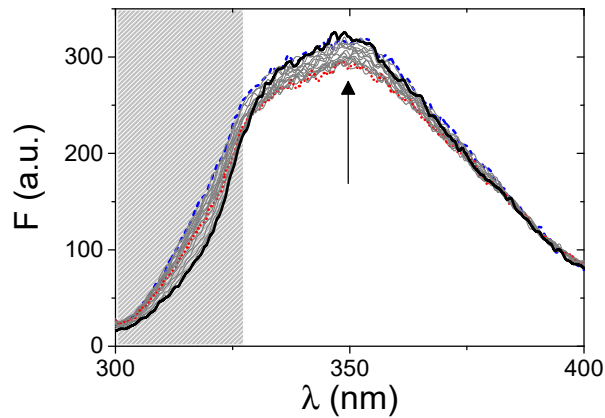

**Figure S4.** Spectrofluorimetric titration for the DQ/BSA system. The grey area highlights the distortions due to DQ absorbance effects. The arrow indicates the fluorescence emission profile likely due to free DQ contribution, which becomes evident for  $C_{\text{DQ}} > 1.86 \times 10^{-6}$  M; accordingly, the binding isotherm in Figure 7 is cut at  $C_{\text{DQ}} < 1.86 \times 10^{-6}$  M;  $C_{\text{BSA}} = 1.50 \times 10^{-6}$  M,  $C_{\text{DQ}}$  from 0 (dashed blue line) to  $1.86 \times 10^{-6}$  M (dotted red line) and  $1.07 \times 10^{-5}$  M (straight black line), NaCl 0.1 M, NaCac 2.5 mM, pH 7.0, 37.0°C,  $\lambda_{\text{exc}} = 295$  nm.



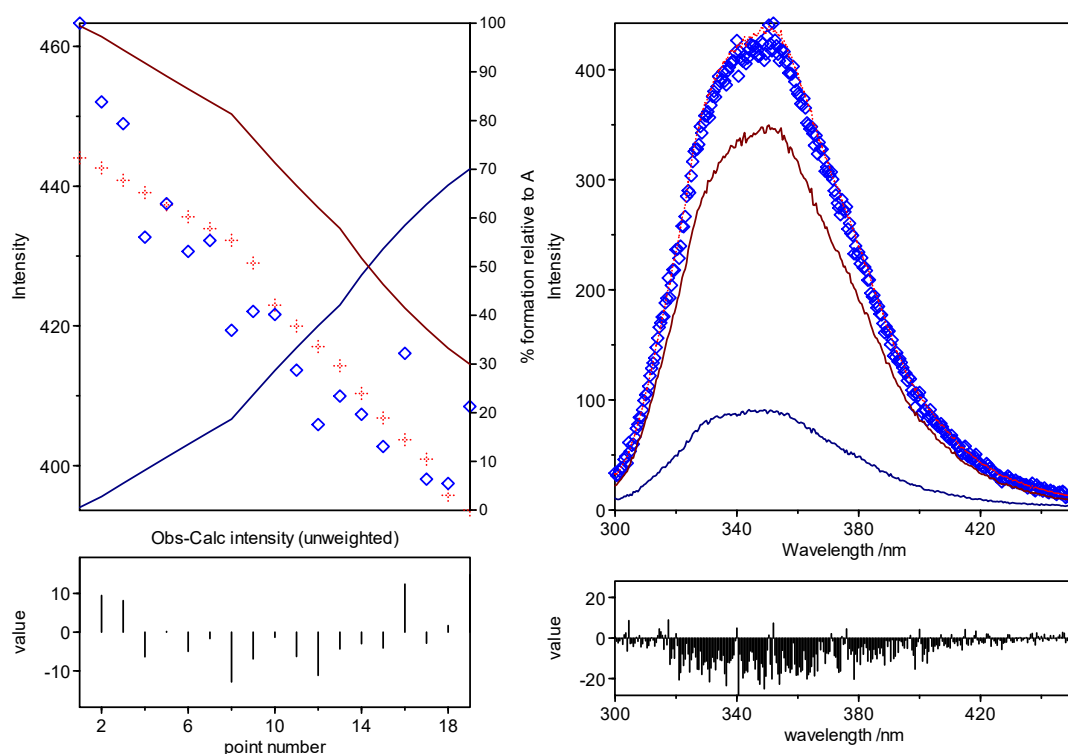

**Figure S5.** HypSpec2014 analysis of the fluorescence changes observed upon addition of DQ to BSA;  $C_{\text{BSA}} = 1.50 \times 10^{-6}$  M,  $C_{\text{DQ}}$  from 0 to  $1.77 \times 10^{-6}$  M, NaCl 0.1 M, NaCac 2.5 mM, pH 7.0, 37.0°C,  $\lambda_{\text{exc}} = 295$  nm. Left: titration curve at 345 nm (open diamond = experimental, cross = calculated) and species distribution (dark red = free BSA, red = PQ/BSA adduct). Right: fluorescence spectrum ((open diamond = experimental, dashed red line = calculated) and relevant deconvolution (dark red = free BSA, red = PQ/BSA adduct). The bottom panels are the residuals.

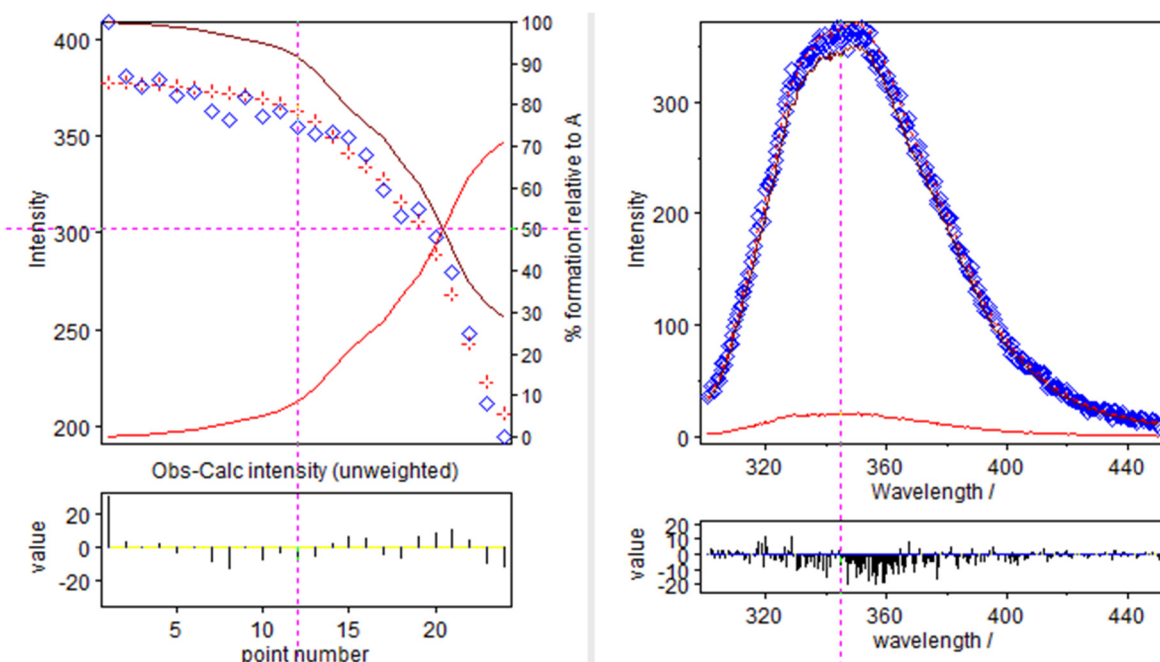

**Figure S6.** HypSpec2014 analysis of the fluorescence changes observed upon addition of PQ to BSA;  $C_{\text{BSA}} = 1.54 \times 10^{-6}$  M,  $C_{\text{PQ}}$  from 0 to  $5.12 \times 10^{-5}$  M, NaCl 0.1 M, NaCac 2.5 mM, pH 7.0, 37.0°C,  $\lambda_{\text{exc}} = 295$  nm. Left: titration curve at 345 nm (open diamond = experimental, cross = calculated) and species distribution (dark red = free BSA, red = PQ/BSA adduct). Right: fluorescence spectrum ((open diamond = experimental, dashed red line = calculated) and relevant deconvolution (dark red = free BSA, red = PQ/BSA adduct). The bottom panels are the residuals.



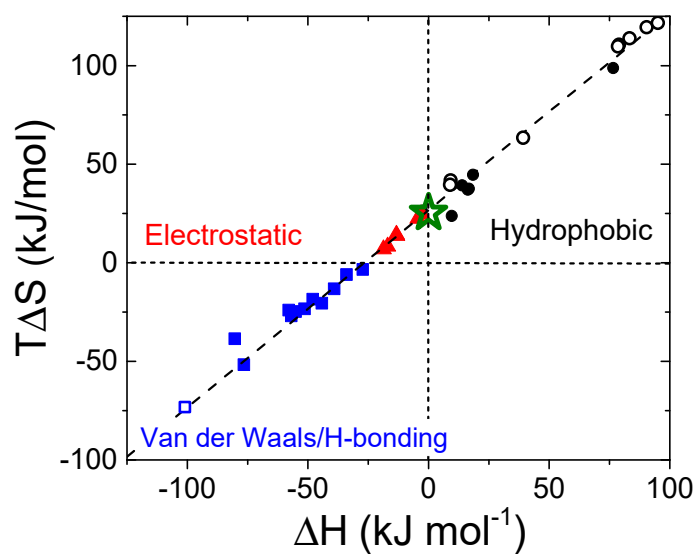

**Figure S7.** Plot of  $\Delta H$  vs.  $T\Delta S$  for different ligands binding to BSA according to <https://doi.org/10.1016/j.jinorgbio.2020.111305>. Different points relate to the different driving forces for binding: (●) = hydrophobic forces, (■) = van der Waals/H-bonding, (▲) = electrostatic. Full point refer to organic molecules, open points refer to metal complexes. The star refers to what was found in this work for the PQ/BSA system.

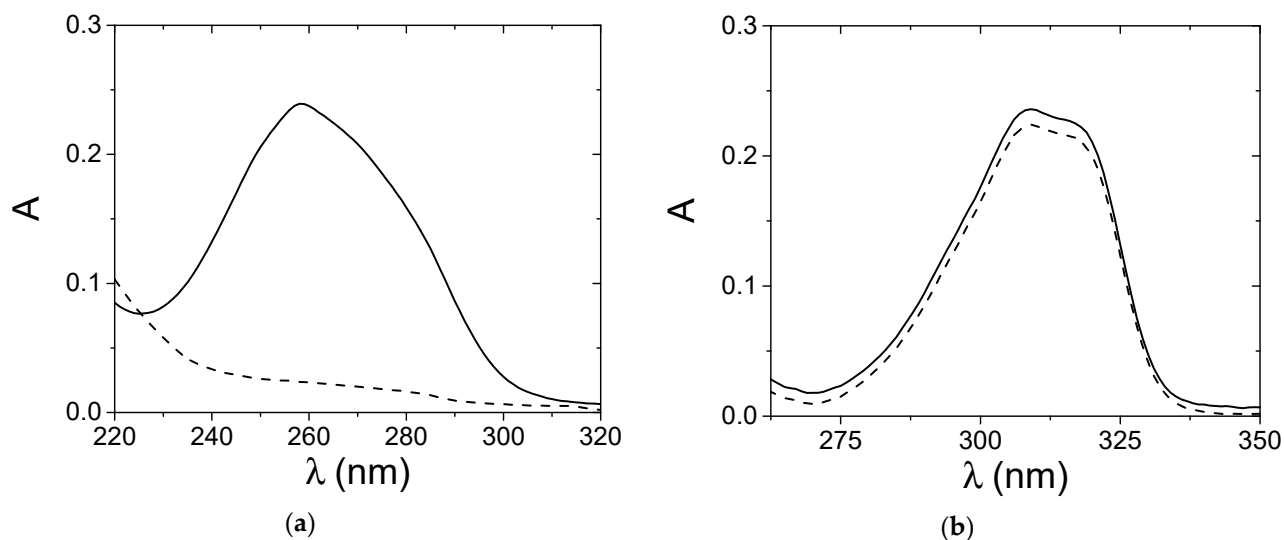

**Figure S8.** Absorbance spectra of (a) PQ in SDS 0.01 M before (solid) and after (dash) ultrafiltration and (b) DQ in DTAC 0.01 M before (solid) and after (dash) ultrafiltration; NaCl 0.1 M, NaCac 2.5 mM, pH 7.0.
